# Supplementary material for: Effect of processing Verdejo grape must by UHPH using non- Saccharomyces yeasts in the absence of SO 2
Source: Royal Society of Chemistry journal article supplement (doi:10.1039/d3fb00226h), 2024-01-01
Supplement: d3fb00226h1.pdf [file d3fb00226h1.pdf]

Supplementary Table 1. Fermentative volatiles in control and UHPH musts fermented by *Saccharomyces cerevisiae* (Sc7VA), *Lachancea thermotolerans* (L31), *Torulaspora delbrueckii* (Td), *Hanseniaspora vineae* (Hv), *Metschnikowia pulcherrima* (M29). Compounds analyzed by HS-SPME-GC-MS, values are means  $\pm$  sd (fermentations in triplicate) in  $\mu\text{g L}^{-1}$ . Different letters within the same row mean significant differences for ANOVA and Tukey HSD test at  $p < 0.05$ .

|                         | Sc7VA                |                      | L31                  |                      | Td                   |                      | Hv                   |                      | M29                  |                      |
|-------------------------|----------------------|----------------------|----------------------|----------------------|----------------------|----------------------|----------------------|----------------------|----------------------|----------------------|
|                         | Control              | UHPH                 |
|                         | Me<br>an<br>$\pm$ SD |
| Ethyl hexanoate         | 185.2 $\pm$ 26.8 f   | 136.4 $\pm$ 17.4 de  | 74.7 $\pm$ 5.0 bc    | 39.7 $\pm$ 1.9 ab    | 107.7 $\pm$ 11.7 cd  | 28.6 $\pm$ 3.1 a     | 98.9 $\pm$ 8.4 c     | 22.3 $\pm$ 2.2 a     | 161.2 $\pm$ 16.3 ef  | 77.4 $\pm$ 8.3 c     |
| Hexyl acetate           | 4.7 $\pm$ 0.5 c      | 14.7 $\pm$ 1.4 d     | 0.7 $\pm$ 0.1 a      | 0.7 $\pm$ 0.0 a      | 4.4 $\pm$ 0.4 c      | 0.6 $\pm$ 0.1 a      | 2.6 $\pm$ 0.2 b      | 1.2 $\pm$ 0.1 ab     | 4.8 $\pm$ 0.5 c      | 2.4 $\pm$ 0.2 b      |
| Ethyl-3-hexenoate       | 0.5 $\pm$ 0.0 bc     | 0.0 $\pm$ 0.0 a      | 2.9 $\pm$ 0.4 d      | 0.0 $\pm$ 0.0 a      | 0.8 $\pm$ 0.2 c      | 0.2 $\pm$ 0.0 ab     | 0.1 $\pm$ 0.0 a      | 0.0 $\pm$ 0.0 a      | 0.2 $\pm$ 0.1 ab     | 0.2 $\pm$ 0.0 ab     |
| 3-Hexen-1-ol acetate    | 0.8 $\pm$ 0.1 de     | 1.5 $\pm$ 0.2 f      | 0.0 $\pm$ 0.0 a      | 0.2 $\pm$ 0.2 ab     | 0.6 $\pm$ 0.1 cd     | 0.0 $\pm$ 0.0 a      | 0.3 $\pm$ 0.0 abc    | 0.2 $\pm$ 0.2 ab     | 1.0 $\pm$ 0.1 e      | 0.4 $\pm$ 0.1 bcd    |
| 4-methyl-1-pentanol     | 0.8 $\pm$ 0.2 d      | 0.2 $\pm$ 0.0 a      | 0.5 $\pm$ 0.1 bc     | 0.2 $\pm$ 0.0 ab     | 0.5 $\pm$ 0.1 c      | 0.2 $\pm$ 0.0 a      | 0.4 $\pm$ 0.1 abc    | 1.4 $\pm$ 0.1 e      | 0.6 $\pm$ 0.1 cd     | 0.1 $\pm$ 0.0 a      |
| 3-Hexen-1-ol, (E)-      | 2.1 $\pm$ 0.8 a      | 1.8 $\pm$ 0.4 a      | 1.6 $\pm$ 0.3 a      | 2.1 $\pm$ 0.4 a      | 1.7 $\pm$ 0.3 a      | 1.5 $\pm$ 0.3 a      | 1.5 $\pm$ 0.3 a      | 2.0 $\pm$ 0.5 a      | 2.1 $\pm$ 0.6 ab     | 2.2 $\pm$ 0.5 a      |
| 3-ethoxy-1-propanol     | 0.4 $\pm$ 0.1 a      | 1.4 $\pm$ 0.4 bcd    | 1.8 $\pm$ 0.4 cd e   | 2.2 $\pm$ 0.4 de     | 1.1 $\pm$ 0.2 abc    | 2.4 $\pm$ 0.5 e      | 0.3 $\pm$ 0.0 a      | 1.1 $\pm$ 0.3 abc    | 0.6 $\pm$ 0.1 ab     | 1.1 $\pm$ 0.3 abc    |
| 3-Hexen-1-ol, (Z)-      | 1.1 $\pm$ 0.2 a      | 1.7 $\pm$ 0.4 a      | 1.0 $\pm$ 0.1 a      | 1.5 $\pm$ 0.6 a      | 1.0 $\pm$ 0.2 a      | 1.3 $\pm$ 0.2 a      | 1.0 $\pm$ 0.1 a      | 1.5 $\pm$ 0.4 a      | 1.1 $\pm$ 0.2 ab     | 1.7 $\pm$ 0.5 a      |
| Ethyl octanoate         | 308.2 $\pm$ 26.8 i   | 211.7 $\pm$ 30.0 gh  | 96.1 $\pm$ 7.5 cd    | 67.5 $\pm$ 11.3 bc   | 160.1 $\pm$ 11.5 ef  | 40.7 $\pm$ 3.1 ab    | 192.5 $\pm$ 10.2 fg  | 20.3 $\pm$ 2.8 a     | 243.4 $\pm$ 11.4 h   | 125.8 $\pm$ 15.6 de  |
| Acetic acid             | 27.3 $\pm$ 6.5 ab    | 57.6 $\pm$ 12.7 c    | 24.2 $\pm$ 3.1 ab    | 25.6 $\pm$ 3.8 ab    | 37.7 $\pm$ 7.0 abc   | 15.7 $\pm$ 4.0 a     | 63.0 $\pm$ 11.6 c    | 48.1 $\pm$ 10.8 bc   | 45.2 $\pm$ 9.1 bc    | 57.0 $\pm$ 12.3 c    |
| 3-methylbutyl hexanoate | 1.7 $\pm$ 0.0 e      | 0.3 $\pm$ 0.2 abc    | 0.5 $\pm$ 0.1 bc     | 0.0 $\pm$ 0.0 a      | 0.6 $\pm$ 0.3 c      | 0.0 $\pm$ 0.0 a      | 0.4 $\pm$ 0.1 bc     | 0.0 $\pm$ 0.0 a      | 1.2 $\pm$ 0.3 d      | 0.1 $\pm$ 0.1 ab     |
| Ethyl-3-octenoate       | 1.7 $\pm$ 0.5 c      | 0.1 $\pm$ 0.0 a      | 4.5 $\pm$ 0.5 e      | 0.1 $\pm$ 0.0 a      | 3.2 $\pm$ 0.2 d      | 0.4 $\pm$ 0.0 ab     | 0.5 $\pm$ 0.0 ab     | 0.2 $\pm$ 0.0 a      | 1.0 $\pm$ 0.2 bc     | 0.2 $\pm$ 0.0 a      |
| 2-Ethyl-1-hexanol       | 0.5 $\pm$ 0.3 a      | 0.5 $\pm$ 0.3 a      | 0.3 $\pm$ 0.1 a      | 2.4 $\pm$ 1.2 a      | 0.4 $\pm$ 0.1 a      | 1.6 $\pm$ 0.7 a      | 0.3 $\pm$ 0.1 a      | 7.8 $\pm$ 1.6 b      | 0.9 $\pm$ 0.6 a      | 1.9 $\pm$ 1.1 a      |
| Benzaldehyde            | 0.3 $\pm$ 0.2 a      | 0.1 $\pm$ 0.0 a      | 0.1 $\pm$ 0.0 a      | 0.1 $\pm$ 0.0 a      | 0.1 $\pm$ 0.1 a      | 0.2 $\pm$ 0.1 a      | 0.3 $\pm$ 0.0 a      | 2.3 $\pm$ 0.5 b      | 0.1 $\pm$ 0.0 a      | 0.0 $\pm$ 0.0 a      |
| Linalool                | 0.8 $\pm$ 0.2 a      | 0.5 $\pm$ 0.1 a      | 0.6 $\pm$ 0.1 a      | 0.8 $\pm$ 0.2 a      | 0.4 $\pm$ 0.1 a      | 0.8 $\pm$ 0.4 a      | 0.4 $\pm$ 0.1 a      | 0.9 $\pm$ 0.4 a      | 0.5 $\pm$ 0.1 a      | 0.5 $\pm$ 0.1 a      |
| 1-Octanol               | 1.7 $\pm$ 0.5 de     | 2.0 $\pm$ 0.2 e      | 0.5 $\pm$ 0.0 ab     | 0.4 $\pm$ 0.1 a      | 1.2 $\pm$ 0.2 bcd    | 0.3 $\pm$ 0.0 a      | 0.8 $\pm$ 0.2 abc    | 0.6 $\pm$ 0.1 ab     | 1.3 $\pm$ 0.3 cde    | 1.0 $\pm$ 0.3 abc    |
| 2-methylpropanoic acid  | 1.7 $\pm$ 0.7 a      | 1.0 $\pm$ 0.2 a      | 4.9 $\pm$ 0.7 d      | 4.0 $\pm$ 0.8 cd     | 5.0 $\pm$ 1.2 d      | 1.5 $\pm$ 0.3 a      | 2.8 $\pm$ 0.6 abc    | 1.9 $\pm$ 0.5 ab     | 3.9 $\pm$ 0.8 bcd    | 2.1 $\pm$ 0.7 abc    |
| $\gamma$ -butyrolactone | 1.2 $\pm$ 0.3 a      | 1.9 $\pm$ 0.4 ab     | 3.4 $\pm$ 0.7 c      | 1.8 $\pm$ 0.3 ab     | 2.3 $\pm$ 0.3 abc    | 3.2 $\pm$ 0.8 bc     | 1.6 $\pm$ 0.4 a      | 1.2 $\pm$ 0.3 a      | 2.4 $\pm$ 0.4 abc    | 1.8 $\pm$ 0.4 a      |
| Butanoic acid           | 1.3 $\pm$ 0.4 ab     | 0.9 $\pm$ 0.2 ab     | 1.2 $\pm$ 0.2 ab     | 0.9 $\pm$ 0.1 ab     | 1.1 $\pm$ 0.2 ab     | 0.7 $\pm$ 0.2 a      | 1.4 $\pm$ 0.1 ab     | 0.8 $\pm$ 0.2 a      | 1.5 $\pm$ 0.4 b      | 1.3 $\pm$ 0.3 ab     |

|                                  |               |               |               |               |               |              |               |               |               |               |
|----------------------------------|---------------|---------------|---------------|---------------|---------------|--------------|---------------|---------------|---------------|---------------|
| Ethyl decanoate                  | 24.3 ± 2.8 bc | 18.2 ± 5.8 b  | 4.0 ± 0.5 a   | 3.5 ± 1.2 a   | 8.4 ± 1.6 a   | 2.5 ± 0.4 a  | 27.6 ± 2.9 c  | 9.2 ± 2.7 a   | 19.3 ± 3.2 b  | 7.6 ± 1.6 a   |
| 3-methylbutanoic acid            | 8.4 ± 2.0 c   | 3.7 ± 0.7 a   | 7.0 ± 1.0 bc  | 5.1 ± 0.8 ab  | 6.9 ± 1.3 bc  | 2.7 ± 0.4 a  | 4.4 ± 0.4 ab  | 3.5 ± 0.6 a   | 6.8 ± 1.2 bc  | 4.1 ± 0.8 ab  |
| Diethyl succinate                | 21.5 ± 6.4 e  | 5.9 ± 0.9 abc | 9.3 ± 2.5 bc  | 3.6 ± 0.8 ab  | 11.3 ± 2.2 cd | 2.5 ± 0.8 ab | 5.0 ± 1.3 abc | 0.5 ± 0.1 a   | 12.7 ± 3.0 d  | 3.2 ± 1.0 ab  |
| Ethyl 9-decanoate                | 14.5 ± 3.1 e  | 4.6 ± 0.9 abc | 9.4 ± 0.7 d   | 1.4 ± 0.1 a   | 22.1 ± 0.5 f  | 2.7 ± 0.1 ab | 12.8 ± 0.7 e  | 6.5 ± 0.6 cd  | 13.0 ± 0.0 e  | 5.5 ± 0.1 bc  |
| 3-methylthio-1-propanol          | 2.7 ± 0.8 cd  | 0.6 ± 0.2 a   | 2.1 ± 0.5 bc  | 0.5 ± 0.1 a   | 3.2 ± 0.6 d   | 0.7 ± 0.2 a  | 1.1 ± 0.3 ab  | 0.5 ± 0.1 a   | 1.6 ± 0.4 abc | 0.5 ± 0.1 a   |
| β-citronellol                    | 0.6 ± 0.2 ab  | 1.0 ± 0.6 b   | 0.3 ± 0.1 a   | 0.4 ± 0.1 ab  | 0.4 ± 0.1 ab  | 0.3 ± 0.1 a  | 0.4 ± 0.1 a   | 0.3 ± 0.0 a   | 0.4 ± 0.1 ab  | 0.7 ± 0.2 ab  |
| ethyl phenylacetate              | 0.3 ± 0.0 d   | 0.2 ± 0.0 abc | 0.3 ± 0.1 cd  | 0.2 ± 0.0 abc | 0.3 ± 0.1 bcd | 0.1 ± 0.0 a  | 0.1 ± 0.1 ab  | 0.2 ± 0.0 abc | 0.2 ± 0.0 abc | 0.3 ± 0.0 bcd |
| Ethyl 4-hydroxybutanoate         | 0.6 ± 0.2 ab  | 1.0 ± 0.1 bcd | 1.3 ± 0.3 cd  | 0.7 ± 0.2 ab  | 0.9 ± 0.2 abc | 1.4 ± 0.3 d  | 0.5 ± 0.2 ab  | 0.3 ± 0.1 a   | 1.0 ± 0.2 bcd | 0.8 ± 0.2 abc |
| β-damascenone                    | 1.3 ± 0.4 a   | 1.4 ± 0.2 a   | 1.3 ± 0.4 a   | 1.6 ± 0.4 a   | 1.7 ± 0.3 a   | 1.2 ± 0.4 a  | 1.2 ± 0.3 a   | 4.5 ± 0.9 b   | 1.4 ± 0.3 a   | 1.5 ± 0.5 a   |
| Hexanoic acid                    | 11.2 ± 3.0 c  | 10.1 ± 1.1 cb | 7.4 ± 1.7 abc | 5.4 ± 0.9 ab  | 8.1 ± 1.4 abc | 3.4 ± 0.7 a  | 7.4 ± 1.2 abc | 4.3 ± 0.6 a   | 11.1 ± 2.4 c  | 9.6 ± 2.2 cb  |
| Phenyl methanol (benzyl alcohol) | 1.2 ± 0.4 c   | 0.3 ± 0.1 a   | 0.5 ± 0.2 ab  | 0.3 ± 0.1 a   | 0.8 ± 0.2 bc  | 0.3 ± 0.1 a  | 0.7 ± 0.2 abc | 0.3 ± 0.1 a   | 0.8 ± 0.2 abc | 0.4 ± 0.1 ab  |
| Octanoic acid                    | 4.8 ± 1.3 bc  | 5.7 ± 0.2 c   | 2.7 ± 0.9 ab  | 2.6 ± 0.6 ab  | 3.8 ± 0.5 abc | 1.4 ± 0.4 a  | 3.5 ± 0.6 abc | 4.6 ± 0.7 bc  | 5.2 ± 1.3 c   | 4.9 ± 1.2 bc  |
| 4-vinylguaiaicol                 | 0.6 ± 0.2 bcd | 0.8 ± 0.1 cd  | 0.2 ± 0.1 a   | 0.4 ± 0.1 ab  | 0.5 ± 0.1 abc | 0.4 ± 0.1 ab | 0.3 ± 0.1 ab  | 0.5 ± 0.1 abc | 0.4 ± 0.1 abc | 0.9 ± 0.2 d   |
| Ethyl hexadecanoate              | 2.0 ± 0.5 b   | 2.3 ± 0.0 bc  | 1.2 ± 0.3 ab  | 2.3 ± 0.3 bc  | 3.8 ± 0.5 d   | 2.0 ± 0.5 b  | 0.7 ± 0.4 a   | 3.3 ± 0.3 cd  | 2.1 ± 0.1 b   | 2.3 ± 0.8 bc  |
| Decanoic acid                    | 0.2 ± 0.0 bc  | 0.3 ± 0.0 e   | 0.1 ± 0.0 ab  | 0.1 ± 0.0 abc | 0.3 ± 0.0 e   | 0.1 ± 0.0 a  | 0.2 ± 0.0 de  | 0.7 ± 0.1 f   | 0.2 ± 0.0 c   | 0.2 ± 0.0 cd  |
| Ethyl 9-hexadecanoate            | 0.3 ± 0.0 a   | 0.5 ± 0.0 a   | 0.3 ± 0.0 a   | 1.2 ± 0.1 b   | 0.3 ± 0.1 a   | 1.4 ± 0.3 b  | 0.1 ± 0.0 a   | 0.2 ± 0.0 a   | 0.3 ± 0.1 a   | 1.2 ± 0.3 b   |
| Ethyl octadecanoate              | 0.2 ± 0.1 a   | 0.3 ± 0.0 a   | 0.2 ± 0.1 a   | 0.3 ± 0.0 a   | 1.1 ± 0.1 c   | 0.2 ± 0.1 a  | 0.1 ± 0.0 a   | 0.5 ± 0.1 b   | 0.3 ± 0.0 a   | 0.2 ± 0.1 a   |
| Ethyl 9-octadecanoate            | 0.3 ± 0.0 ab  | 0.4 ± 0.0 b   | 0.3 ± 0.1 b   | 0.9 ± 0.0 c   | 0.3 ± 0.0 ab  | 0.9 ± 0.2 c  | 0.1 ± 0.0 a   | 0.1 ± 0.0 a   | 0.3 ± 0.0 b   | 0.7 ± 0.2 c   |
| Σesters                          | 566           | 397           | 204           | 122           | 325           | 83           | 342           | 65            | 461           | 227           |
| Σterpenes                        | 1             | 2             | 1             | 1             | 1             | 1            | 1             | 1             | 1             | 1             |
| Totals                           | 637           | 491           | 267           | 181           | 404           | 124          | 435           | 154           | 550           | 322           |
